# Supplementary material
Source: Elsevier journal article supplement (https://rcastoragev2.blob.core.windows.net/e245e24d1a53c310464aa59788855050/mmc1.pdf)
Supplement: mmc1 [file mmc1.pdf]

## Pyrexia after immunisation of Large White pigs with OUR T88/3 in experiment 2

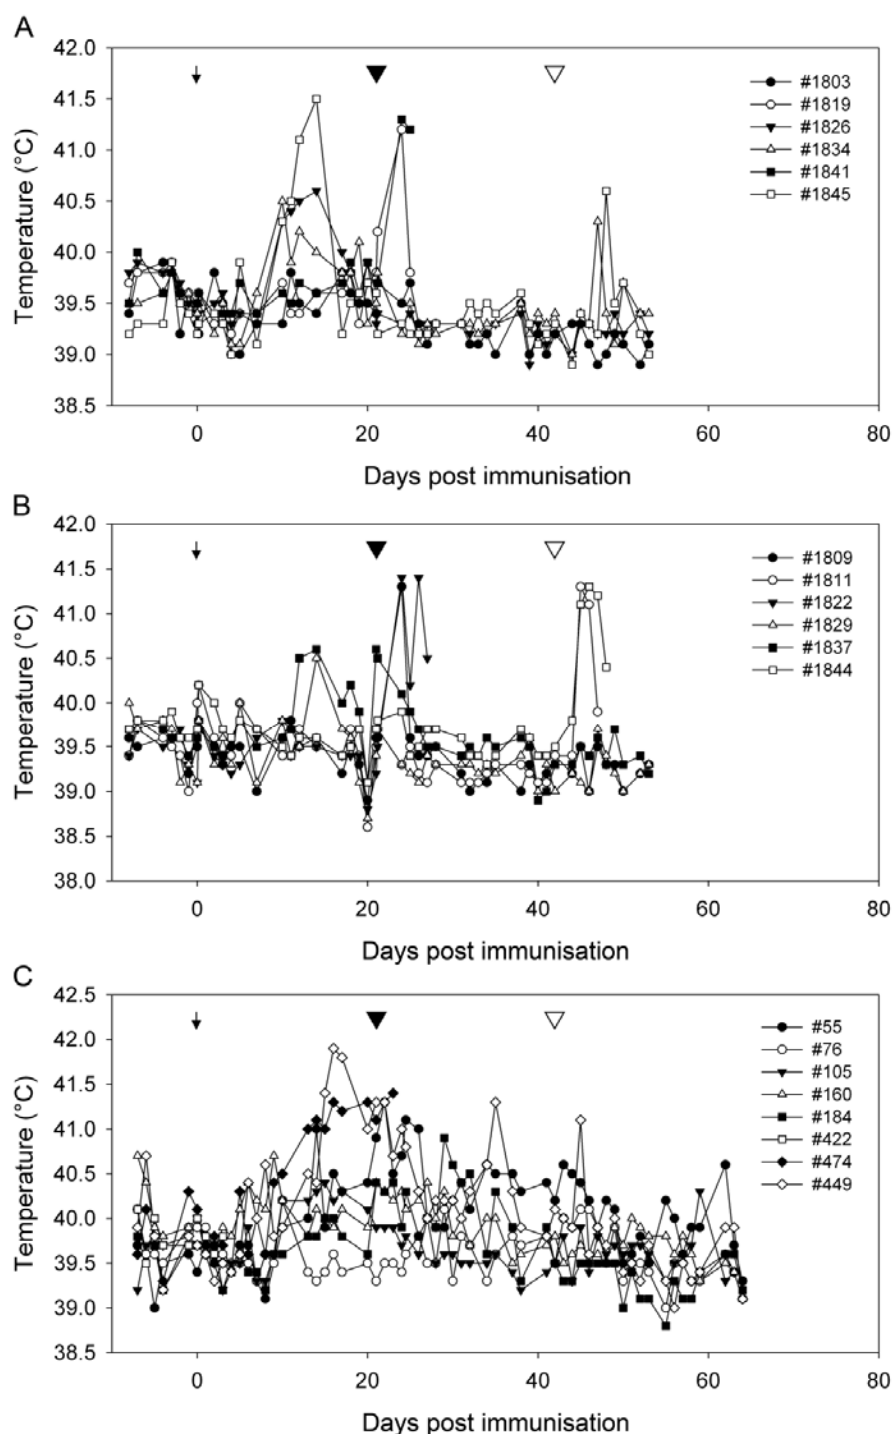

Supplementary figure 1. Pyrexia was observed in some pigs during experiments 2 and 3 after immunisation. Body temperatures are shown on the y-axis and the time post inoculation with OUR T88/3 is shown in days. Panel A shows temperatures of immune pigs from experiment 2 that were challenged with Uganda, panel B shows those challenged with Benin. Panel C shows temperatures of immune pigs from experiment 3 that were challenged with Benin. The arrow on each graph indicates the time of OUR T88/3 immunisation, the black arrowhead indicates the time of OUR T88/1 boost and the open arrowhead indicates the challenge.

Immune pigs continue to put on weight after challenge with virulent African swine fever virus

Experiment 2

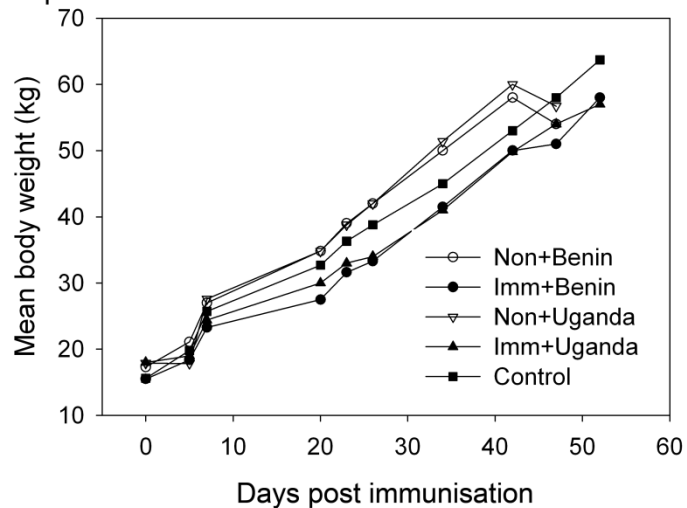

Experiment 3

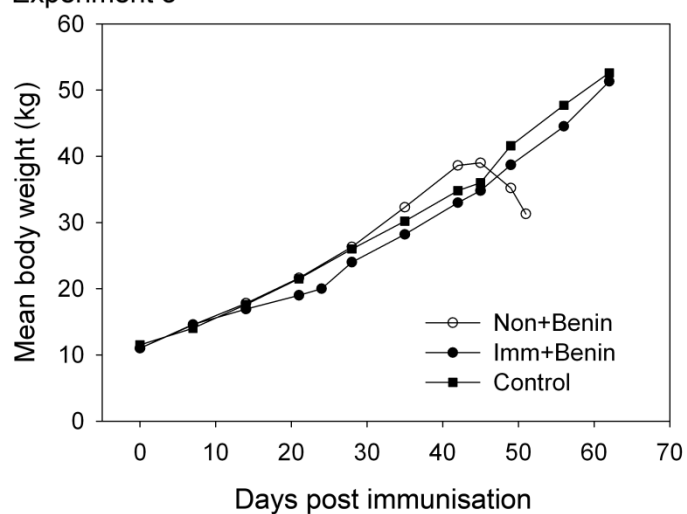

Supplementary figure 2. Mean weight per group from experiments 2 and 3 over time. Non-immune pig groups challenged with virulent ASFV are labelled as Non+ and immune pigs as Imm+, with the virus isolate indicated in each case.

## Clinical scoring system for African swine fever

Supplementary Table 1 The guideline of clinical score for ASF\*

|                                                                                                                                                                |
|----------------------------------------------------------------------------------------------------------------------------------------------------------------|
| 1. Temperature : $<39 = 0$ , $39.0 < \text{to} < 39.5 = 1$ , $39.5 \leq \text{to} < 40 = 2$ , $40.0 \text{ to} \leq 40.5 = 3$ , $40.6 \leq 41 = 4$ , $>41 = 5$ |
| 2. Inappetence : Reduced eating (1), Only picking at food (4), Not eating (6)                                                                                  |
| 3. Recumbancy : Lethargic (1), Get up only when touched (2), Slow to get up when touched (4), Remain recumbent when touched (6)                                |
| 4. Skin Haemorrhage : Haemorrhagic areas on ears and body (1), Generalised haemorrhage all over body (3)                                                       |
| 5. Joint Swelling : a joint swelling (1), Severe swelling with difficulty walking (4)                                                                          |
| 5. Laboured breathing and/or coughing (1), Severe (3)                                                                                                          |
| 7. Occular discharge (1),(gummed up eyes)                                                                                                                      |
| 8. Diarrhoea (1), Bloody Diarrhoea (4)                                                                                                                         |
| 9. Blood in Urine (4)                                                                                                                                          |
| 10. Vomiting (4)                                                                                                                                               |

\*The clinical assessment of ASFV was composed of 10 different categories each scored between 0 and 6.

Supplementary Table 2. Summary of pig numbers for immunised, challenged, shown symptoms, death, virus positive by PCR and HAD

|            | Inoculation 1 |       | Inoculation 2 |       | Challenge |        | Number of viraemic, survived pigs |     | Virus detection in tissues from survived pigs at termination |     |
|------------|---------------|-------|---------------|-------|-----------|--------|-----------------------------------|-----|--------------------------------------------------------------|-----|
|            | Symptoms      | Death | Symptoms      | Death | Symptoms  | Death† | PCR                               | HAD | PCR                                                          | HAD |
| EXP 1      | OURT88/3      |       | OURT88/1      |       | Benin97   |        |                                   |     |                                                              |     |
| Non-immune | -             | -     | -             | -     | 4/4       | 4/4    | -                                 | -   | -                                                            | -   |
| Immunised  | 0/3           | 0/3   | 0/3           | 0/3   | 0/3       | 0/3    | 0/3                               | 0/3 | 0/3                                                          | 0/3 |
| EXP 2-A    | OURT88/3      |       | OURT88/1      |       | Uganda    |        |                                   |     |                                                              |     |
| Non-immune | -             | -     | -             | -     | 5/5       | 5/5    | -                                 | -   | -                                                            | -   |
| Immunised  | 3/6           | 0/6   | 2/6           | 2/6   | 2/4       | 0/4    | 2/4                               | 2/4 | NT                                                           | NT  |
| EXP 2-B    | OURT88/3      |       | OURT88/1      |       | Benin 97  |        |                                   |     |                                                              |     |
| Non-immune | -             | -     | -             | -     | 5/5       | 5/5    | -                                 | -   | -                                                            | -   |
| Immunised  | 2/6           | 0/6   | 2/6           | 1/6   | 2/5       | 2/5    | 3/3                               | 0/3 | NT                                                           | NT  |
| EXP 3      | OURT88/3      |       | OURT88/1      |       | Benin 97  |        |                                   |     |                                                              |     |
| Non-immune | -             | -     | -             | -     | 6/6       | 6/6    | -                                 | -   | -                                                            | -   |
| Immunised  | 1/7           | 1/7   | 0/6           | 0/6   | 0/6       | 0/6    | 0/6                               | 0/6 | 1/6                                                          | 0/6 |

†: All dead pigs were positive for viraemia and infectious ASFV in tissues by both PCR and HAD

NT: Not tested
